# Supplementary material for: Neutron spin echo spectroscopy with a moving sample
Source: PubMed Central journal article supplement (PMC10421866; doi:10.1038/s41598-023-39854-4), 2023-08-11
Supplement: 41598_2023_39854_MOESM1_ESM.pdf [file 41598_2023_39854_MOESM1_ESM.pdf]

# Supplementary Information: Neutron spin echo spectroscopy with a moving sample

Manuchar Gvaramia<sup>1,+</sup>, Philipp Gutfreund<sup>2,+,\*</sup>, Peter Falus<sup>2</sup>, Antonio Faraone<sup>3</sup>, Michihiro Nagao<sup>3,4,5</sup>, and Max Wolff<sup>1,\*</sup>

<sup>1</sup>Department for Physics and Astronomy, Uppsala University, Regementsvägen 1, SE-75120 Uppsala, Sweden

<sup>2</sup>Institut Laue–Langevin, CS 20156, 38042 Grenoble Cedex 9, France

<sup>3</sup>Center for Neutron Research, National Institute of Standards and Technology, Gaithersburg, MD, United States

<sup>4</sup>Department of Materials Science and Engineering, University of Maryland, College Park, MD, United States

<sup>5</sup>Department of Physics and Astronomy, University of Delaware, Newark, DE, United States

\*corresponding. gutfreund@ill.eu, max.wolff@physics.uu.se

+these authors contributed equally to this work

## ABSTRACT

Additional Data.

Figure S1 depicts calculated and measured amplitudes for the same experimental conditions as shown in Fig. 4 in the main article but for shorter Fourier times of 5 ns and 42.5 ns.

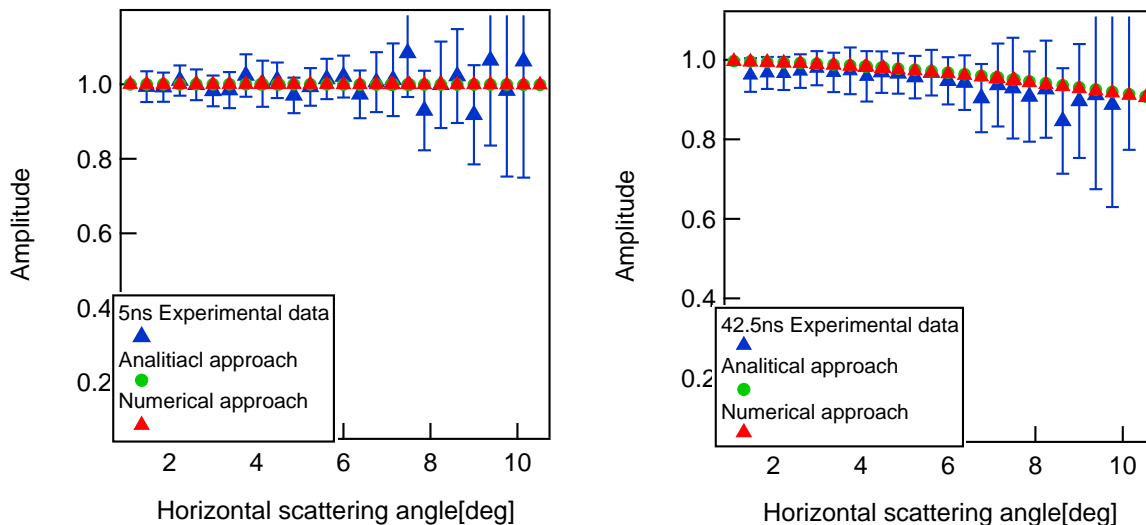

**Figure S1.** Experimental amplitudes as a function of detector angle for Fourier times of (a) 5 ns, (b) 42.5 ns from a graphite block rotating at a speed of 73 rpm.

Finally, the 2D amplitude map for a liquid sample at 75 rpm without slip using the same parameters as in Fig. 6 of the main text is shown in Fig. S2.

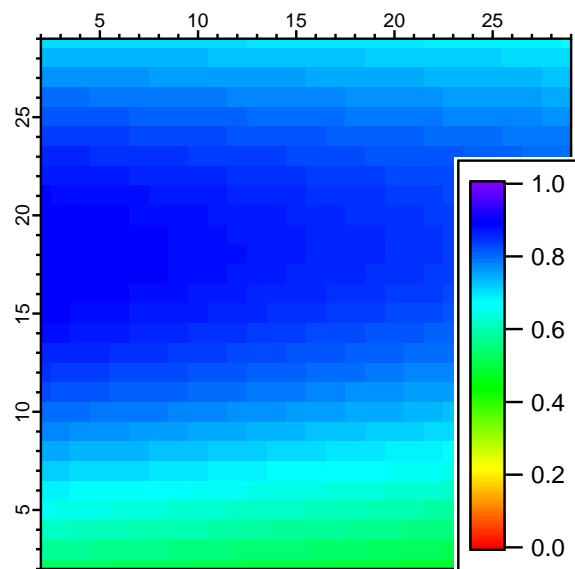

**Figure S2.** Numerically calculated 2D amplitude for a liquid sample at 75 rpm without slip using the same parameters as in Fig. 6 of the main text at a detector angle of  $9^\circ$ .
